# Supplementary material for: Habitat Fragmentation Reduces Genetic Diversity and Connectivity of the Mexican Spotted Owl: A Simulation Study Using Empirical Resistance Models
Source: PubMed Central journal article supplement (PMC6115790; doi:10.3390/genes9080403), 2018-08-10
Supplement: genes-09-00403-s001.pdf [file genes-09-00403-s001.pdf]

**Table S1.** Relationship between  $D_{ps}$  and resistance distance. The highest  $R^2$  of each scenario is highlighted in yellow.

| Model              | Dispersal | Isolation | Linear |        | Logarithmic |        | Exponential |        |
|--------------------|-----------|-----------|--------|--------|-------------|--------|-------------|--------|
|                    |           |           | $R^2$  | $p$    | $R^2$       | $p$    | $R^2$       | $p$    |
| Low fragmentation  | High      | IBD       | 0.640  | <0.001 | 0.541       | <0.001 | 0.642       | <0.001 |
|                    |           | IBR       | 0.324  | <0.001 | 0.255       | <0.001 | 0.005       | <0.001 |
|                    | Low       | IBD       | 0.689  | <0.001 | 0.571       | <0.001 | 0.691       | <0.001 |
|                    |           | IBR       | 0.162  | <0.001 | 0.161       | <0.001 | 0.026       | <0.001 |
| High fragmentation | High      | IBD       | 0.376  | <0.001 | 0.353       | <0.001 | 0.378       | <0.001 |
|                    |           | IBR       | 0.420  | <0.001 | 0.500       | <0.001 | 0.220       | <0.001 |
|                    | Low       | IBD       | 0.418  | <0.001 | 0.377       | <0.001 | 0.421       | <0.001 |
|                    |           | IBR       | 0.104  | <0.001 | 0.129       | <0.001 | 0.034       | <0.001 |

**Table S2.** Relationship between effective population size ( $N_s$ ) and connectivity. The highest  $R^2$  of each scenario is highlighted in yellow.

| Model              | Dispersal | Isolation | Linear |        | Logarithmic |        | Exponential |        |
|--------------------|-----------|-----------|--------|--------|-------------|--------|-------------|--------|
|                    |           |           | $R^2$  | $p$    | $R^2$       | $p$    | $R^2$       | $p$    |
| Low fragmentation  | High      | IBD       | 0.880  | <0.001 | 0.732       | <0.001 | 0.697       | <0.001 |
|                    |           | IBR       | 0.887  | <0.001 | 0.809       | <0.001 | 0.927       | <0.001 |
|                    | Low       | IBD       | 0.800  | <0.001 | 0.682       | <0.001 | 0.616       | <0.001 |
|                    |           | IBR       | 0.932  | <0.001 | 0.840       | <0.001 | 0.762       | <0.001 |
| High fragmentation | High      | IBD       | 0.330  | <0.001 | 0.378       | <0.001 | 0.311       | <0.001 |
|                    |           | IBR       | 0.670  | <0.001 | 0.528       | <0.001 | 0.586       | <0.001 |
|                    | Low       | IBD       | 0.181  | <0.001 | 0.238       | <0.001 | 0.169       | <0.001 |
|                    |           | IBR       | 0.705  | <0.001 | 0.592       | <0.001 | 0.361       | <0.001 |

**Table S3.** Relationship between allelic richness ( $A_r$ ) and connectivity. The highest  $R^2$  of each scenario is highlighted in yellow.

| Model              | Dispersal | Isolation | Linear |        | Logarithmic |        | Exponential |        |
|--------------------|-----------|-----------|--------|--------|-------------|--------|-------------|--------|
|                    |           |           | $R^2$  | $p$    | $R^2$       | $p$    | $R^2$       | $p$    |
| Low fragmentation  | High      | IBD       | 0.115  | <0.001 | 0.021       | <0.001 | 0.111       | <0.001 |
|                    |           | IBR       | 0.949  | <0.001 | 0.930       | <0.001 | 0.938       | <0.001 |
|                    | Low       | IBD       | 0.061  | <0.001 | 0.020       | <0.001 | 0.058       | <0.001 |
|                    |           | IBR       | 0.849  | <0.001 | 0.918       | <0.001 | 0.256       | <0.001 |
| High fragmentation | High      | IBD       | 0.077  | <0.001 | 0.009       | 0.001  | 0.077       | <0.001 |
|                    |           | IBR       | 0.558  | <0.001 | 0.670       | <0.001 | 0.338       | <0.001 |
|                    | Low       | IBD       | 0.108  | <0.001 | 0.019       | <0.001 | 0.107       | <0.001 |
|                    |           | IBR       | 0.476  | <0.001 | 0.439       | <0.001 | 0.227       | <0.001 |

**Table S4.** Relationship between observed heterozygosity ( $H_o$ ) and connectivity. The highest  $R^2$  of each scenario is highlighted in yellow.

| Model              | Dispersal | Isolation | Linear |        | Logarithmic |        | Exponential |        |
|--------------------|-----------|-----------|--------|--------|-------------|--------|-------------|--------|
|                    |           |           | $R^2$  | $p$    | $R^2$       | $p$    | $R^2$       | $p$    |
| Low fragmentation  | High      | IBD       | 0.017  | <0.001 | 0.008       | 0.003  | 0.016       | <0.001 |
|                    |           | IBR       | 0.949  | <0.001 | 0.943       | <0.001 | 0.945       | <0.001 |
|                    | Low       | IBD       | 0.006  | 0.010  | 0.005       | 0.013  | 0.005       | 0.011  |
|                    |           | IBR       | 0.631  | <0.001 | 0.748       | <0.001 | 0.125       | <0.001 |
| High fragmentation | High      | IBD       | 0.038  | <0.001 | 0.000       | 0.380  | 0.038       | <0.001 |
|                    |           | IBR       | 0.549  | <0.001 | 0.656       | <0.001 | 0.300       | <0.001 |
|                    | Low       | IBD       | 0.109  | <0.001 | 0.019       | <0.001 | 0.109       | <0.001 |
|                    |           | IBR       | 0.397  | <0.001 | 0.374       | <0.001 | 0.204       | <0.001 |

**Table S5.** Relationship between expected heterozygosity ( $H_e$ ) and connectivity. The highest  $R^2$  of each scenario is highlighted in yellow.

| Model              | Dispersal | Isolation | Linear |        | Logarithmic |        | Exponential |        |
|--------------------|-----------|-----------|--------|--------|-------------|--------|-------------|--------|
|                    |           |           | $R^2$  | $p$    | $R^2$       | $p$    | $R^2$       | $p$    |
| Low fragmentation  | High      | IBD       | 0.073  | <0.001 | 0.007       | 0.004  | 0.072       | <0.001 |
|                    |           | IBR       | 0.936  | <0.001 | 0.930       | <0.001 | 0.929       | <0.001 |
|                    | Low       | IBD       | 0.050  | <0.001 | 0.016       | <0.001 | 0.049       | <0.001 |
|                    |           | IBR       | 0.614  | <0.001 | 0.731       | <0.001 | 0.121       | <0.001 |
| High fragmentation | High      | IBD       | 0.069  | <0.001 | 0.007       | 0.005  | 0.069       | <0.001 |
|                    |           | IBR       | 0.525  | <0.001 | 0.636       | <0.001 | 0.282       | <0.001 |
|                    | Low       | IBD       | 0.109  | <0.001 | 0.018       | <0.001 | 0.109       | <0.001 |
|                    |           | IBR       | 0.392  | <0.001 | 0.369       | <0.001 | 0.203       | <0.001 |

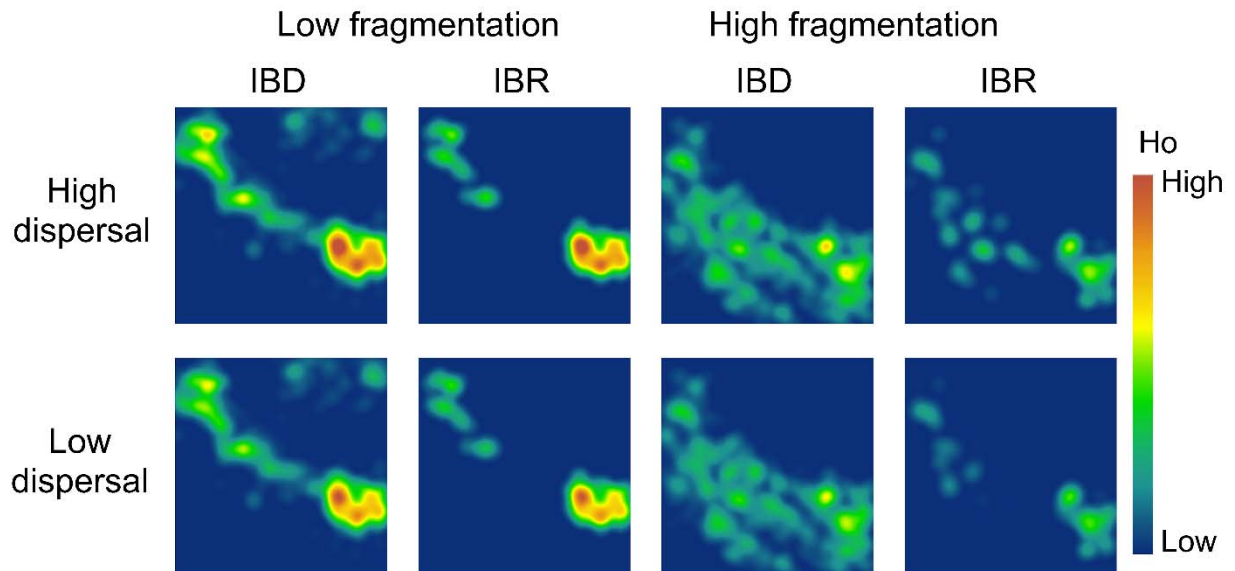

**Figure S1.** Spatial patterns of observed heterozygosity ( $H_o$ ) in the low fragmentation model (left two columns) and the high fragmentation model (right two columns). IBD: isolation-by-distance. IBR: isolation-by-resistance. Top row: high dispersal scenario (300 km). Bottom row: low dispersal scenario (200 km).

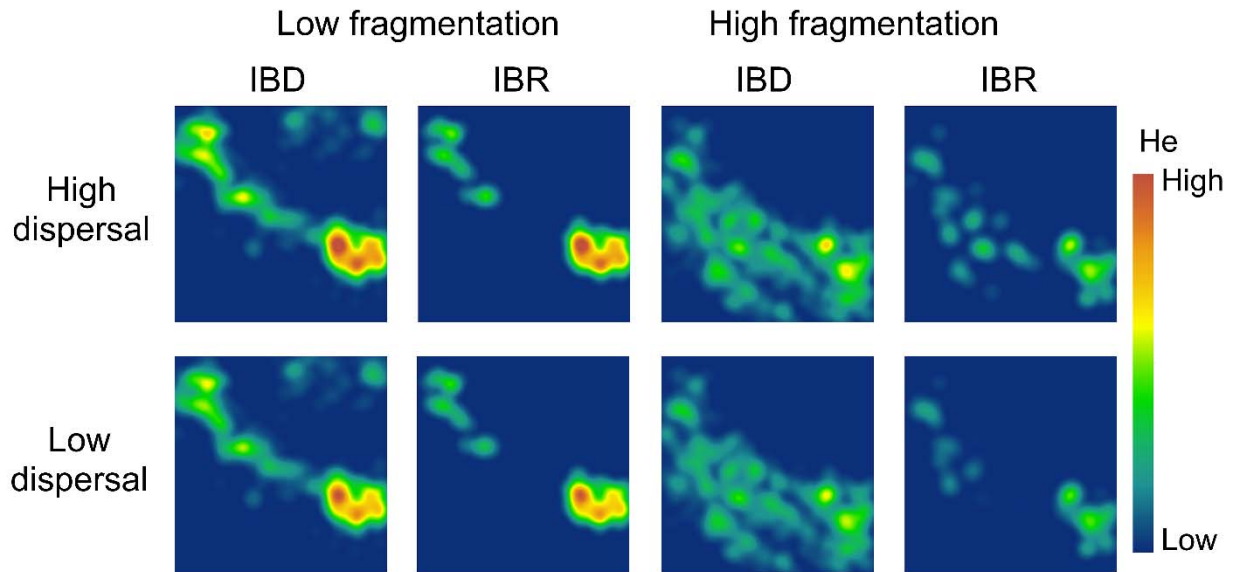

**Figure S2.** Spatial patterns of expected heterozygosity ( $H_e$ ) in the low fragmentation model (left two columns) and the high fragmentation model (right two columns). IBD: isolation-by-distance. IBR: isolation-by-resistance. Top row: high dispersal scenario (300 km). Bottom row: low dispersal scenario (200 km).

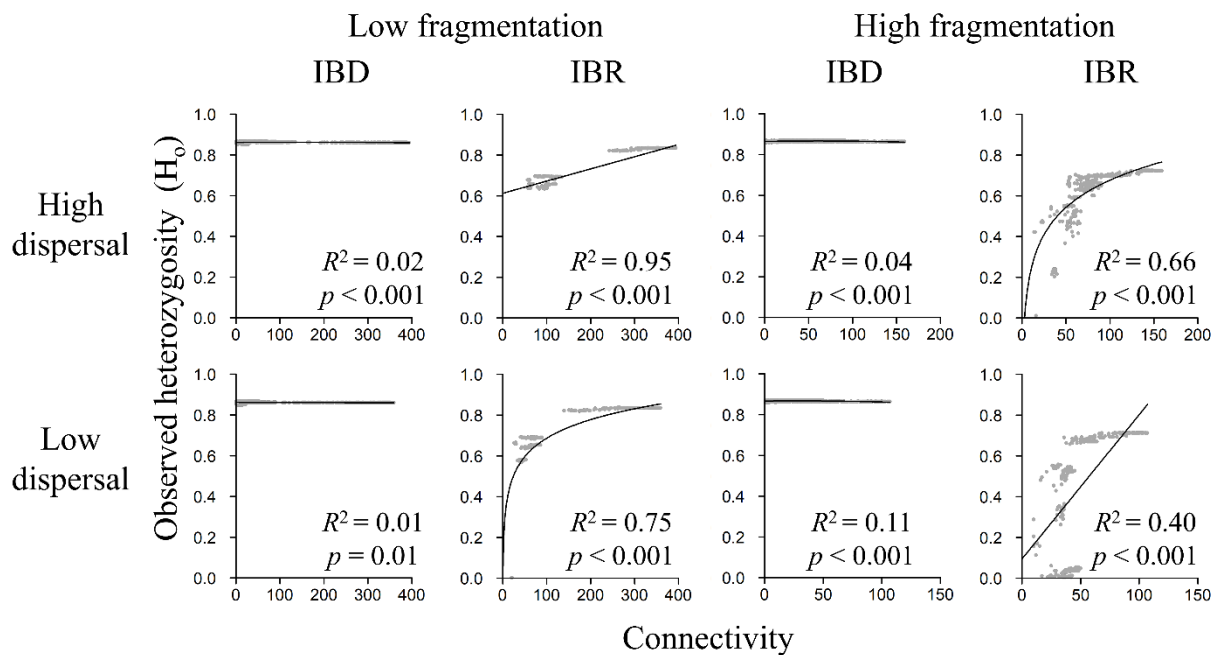

**Figure S3.** Relationship between observed heterozygosity ( $H_o$ ) and landscape connectivity in the low fragmentation model (left two columns) and the high fragmentation model (right two columns). IBD: isolation-by-distance. IBR: isolation-by-resistance. Top row: high dispersal scenario (300 km). Bottom row: low dispersal scenario (200 km). Observed heterozygosity (y-axis) is calculated with software sGD. Connectivity (x-axis) is quantified in terms of cumulative resistant kernel density, representing the expected density of dispersing individuals. Gray markers represent the mean of 100 Monte Carlo simulation runs for each node. Adjusted  $R^2$  and p-value are shown.

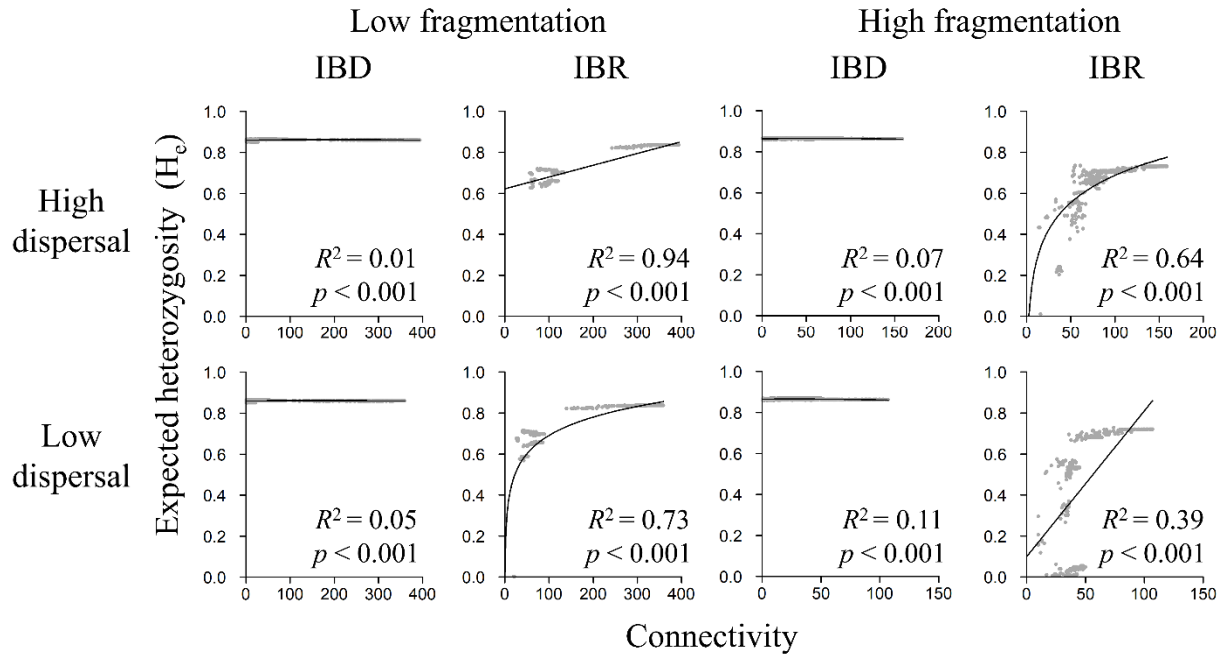

**Figure S4.** Relationship between expected heterozygosity ( $H_e$ ) and landscape connectivity in the low fragmentation model (left two columns) and the high fragmentation model (right two columns). IBD: isolation-by-distance. IBR: isolation-by-resistance. Top row: high dispersal scenario (300 km). Bottom row: low dispersal scenario (200 km). Expected heterozygosity (y-axis) is calculated with software sGD. Connectivity (x-axis) is quantified in terms of cumulative resistant kernel density, representing the expected density of dispersing individuals. Gray markers represent the mean of 100 Monte Carlo simulation runs for each node. Adjusted  $R^2$  and p-value are shown.
